# Supplementary material for: Meso- to nano-scopic domain structures in high Curie-temperature piezoelectric BiScO3–PbTiO3 single crystals of complex perovskite structure
Source: Royal Society of Chemistry journal article supplement (doi:10.1039/d0tc00924e), 2020-01-01
Supplement: d0tc00924e3.pdf [file d0tc00924e3.pdf]

## Supporting Information

### **Meso- to Nano-scopic Domain Structures in High Curie- Temperature Piezoelectric BiScO<sub>3</sub>-PbTiO<sub>3</sub> Single Crystals of Complex Perovskite Structure**

Zeng Luo<sup>1,2</sup>, Zenghui Liu<sup>1,3,\*</sup>, David Walker<sup>2</sup>, Steven Huband<sup>2</sup>, Pam A. Thomas<sup>2</sup>,

Nan Zhang<sup>1,\*</sup>, Wei Ren<sup>1</sup>, and Zuo-Guang Ye<sup>3,\*</sup>

<sup>1</sup> Electronic Materials Research Laboratory, Key Laboratory of the Ministry of Education &

International Center for Dielectric Research, Faculty of Electronic and Information

Engineering, Xi'an Jiaotong University, Xi'an

710049, China

<sup>2</sup> Department of Physics, University of Warwick, Coventry, West Midlands CV4 7AL, UK

<sup>3</sup> Department of Chemistry and 4D LABS, Simon Fraser University, Burnaby, British

Columbia, V5A 1S6, Canada

\* Email addresses: zye@sfu.ca, nzhang1@xjtu.edu.cn and liu.z.h@xjtu.edu.cn

Table 1. Refined crystallographic data for BS-PT at room temperature (RT) and 500 °C. Space group, lattice parameters ( $a$ ,  $b$ ,  $c$ ), angle ( $\beta$ ), atomic positions, and goodness parameters ( $R_{exp}$ ,  $R_{wp}$ ,  $R_p$ , GOF) are listed: (a)  $P4mm$  model, (b) mixed model of  $P4mm$  and  $Pm-3m$ .

| Composition    |     | 0.324BS-0.676PT |               |                       |           |
|----------------|-----|-----------------|---------------|-----------------------|-----------|
| Temperature    |     | 500 °C          | RT            |                       |           |
| Space group    |     | $Pm-3m$         | (a)<br>$P4mm$ | (b)<br>$P4mm$ $Pm-3m$ |           |
| Phase fraction |     |                 |               | 80.64                 | 19.36     |
| $a$            |     | 4.0231(4)       | 3.9760(5)     | 3.9759(4)             | 4.0122(4) |
| $b$            |     | 4.0231(4)       | 3.9760(5)     | 3.9759(4)             | 4.0122(4) |
| $c$            |     | 4.0231(4)       | 4.1003(8)     | 4.1003(8)             | 4.0122(4) |
| $\beta$        |     | 90              | 90            | 90                    | 90        |
| Bi/Pb          | $x$ | 0               | 0             | 0                     | 0         |
|                | $y$ | 0               | 0             | 0                     | 0         |
|                | $z$ | 0               | 0             | 0                     | 0         |
| Sc/Ti          | $x$ | 0.5             | 0.5           | 0.5                   | 0.5       |
|                | $y$ | 0.5             | 0.5           | 0.5                   | 0.5       |
|                | $z$ | 0.5             | 0.55705       | 0.55705               | 0.5       |
| O1             | $x$ | 0.5             | 0.5           | 0.5                   | 0.5       |
|                | $y$ | 0.5             | 0.5           | 0.5                   | 0.5       |
|                | $z$ | 0               | 0.0669        | 0.0669                | 0         |
| O2             | $x$ |                 | 0.5           | 0.5                   |           |
|                | $y$ |                 | 0             | 0                     |           |
|                | $z$ |                 | 0.57565       | 0.57565               |           |
| $R_{exp}$      |     | 5.179           | 5.276         | 5.268                 |           |
| $R_{wp}$       |     | 10.408          | 18.104        | 11.211                |           |
| $R_B$          |     | 2.195           | 4.299         | 2.382                 | 4.022     |
| GOF            |     | 2.01            | 3.431         | 2.128                 |           |

2. Video of  $|\sin\delta|$  (Sind\_1. mp4) images as a function of temperature.

3. Video of orientation (Ori\_1. mp4) images as a function of temperature.
